# Supplementary material for: Optimal Volume of Moderate-to-Vigorous Physical Activity Postconcussion in Children and Adolescents
Source: PubMed Central journal article supplement (PMC10873766; doi:10.1001/jamanetworkopen.2023.56458), 2024-02-16
Supplement: jamanetwopen-e2356458-s002.pdf [file jamanetwopen-e2356458-s002.pdf]

## **Data Sharing Statement**

### **Data**

**Data available:** No

### **Additional Information**

**Explanation for why data not available:** The data that support the findings of this study are available on reasonable request from the corresponding author with accordance to ethical and legal regulations regarding the sharing of information as to prevent compromising the privacy of research participants.
